# Supplementary material for: The nano-scanning electrical mobility spectrometer (nSEMS) and itsapplication to size distribution measurements of 1.5–25 nm particles
Source: Copernicus journal article supplement (doi:10.5194/amt-2021-62), 2021-03-11
Supplement: Supplementary file 1 [file amt-2021-62-supplement.pdf]

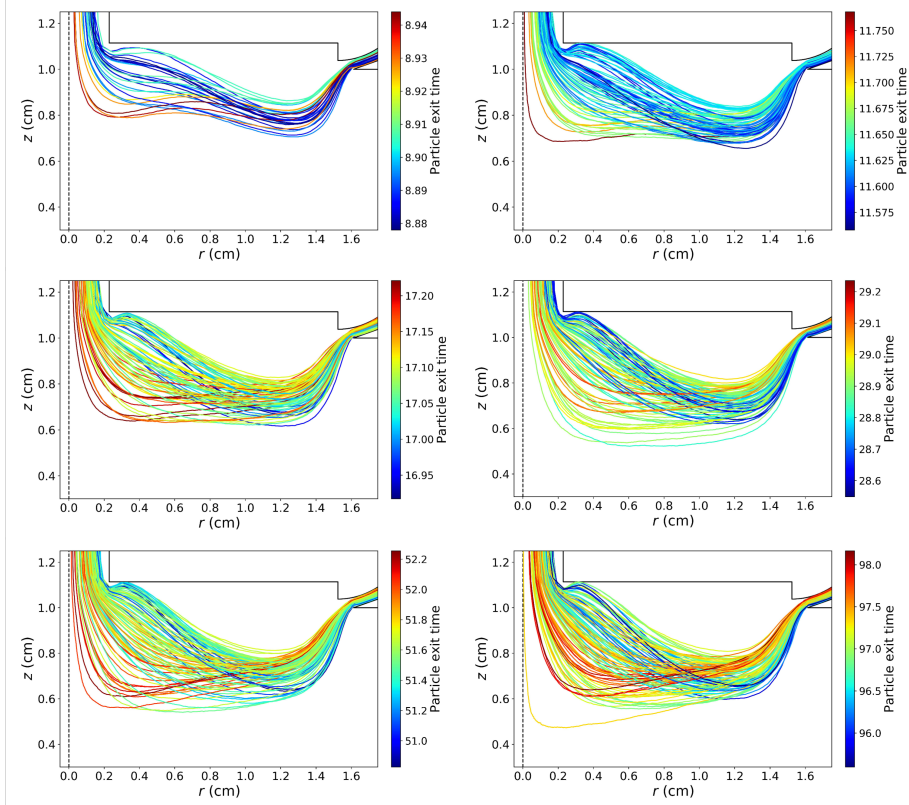

**Figure S1.** Finite-element simulations of particle trajectories at  $d_p = 20.8$  nm with different ramp time,  $t_{\text{ramp}} = 3, 6, 12, 25, 50, 100$  s, from top left to bottom right, respectively. Particles were assumed to be nondiffusive. The simulation was conducted with the flow setting  $Q_x/Q_a = 10$  LPM/1 LPM. The color bar indicates the time at which the particles leave the classifying ROMIAC.

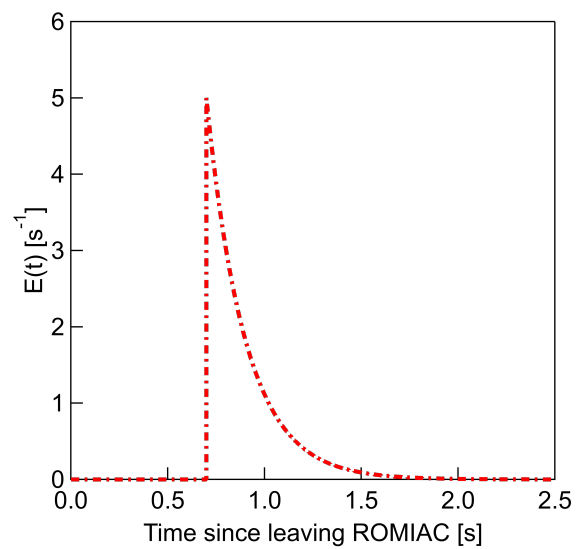

**Figure S2.** CPC residence time distribution fitting using PFR-CSTR in series. The residence time distribution in the CPC can be computed by deconvoluting the quasi-static nSEMS transfer function measured with  $t_{\text{ramp}} = 1400$  s, from that measured with  $t_{\text{ramp}} = 50$  s. The CPC was modeled as a PFR in series with a CSTR and the mean residence time of the PFR,  $\tau_p$ , 0.7 s and that of the CSTR,  $\tau_c$ , is 0.2 s
